# Supplementary material for: A Label-Free Proteomic Approach for the Identification of Biomarkers in the Exosome of Endometrial Cancer Serum
Source: MDPI journal article supplement (doi:10.3390/cancers14246262), 2022-12-19

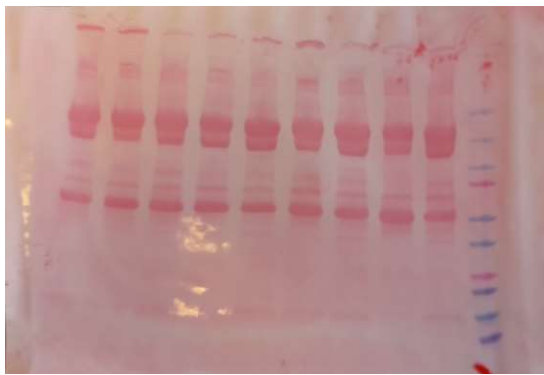

Gel 4

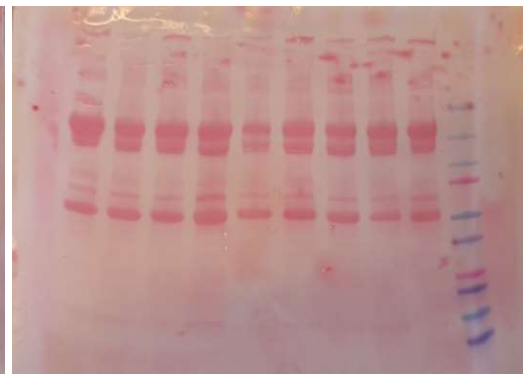

Gel 3

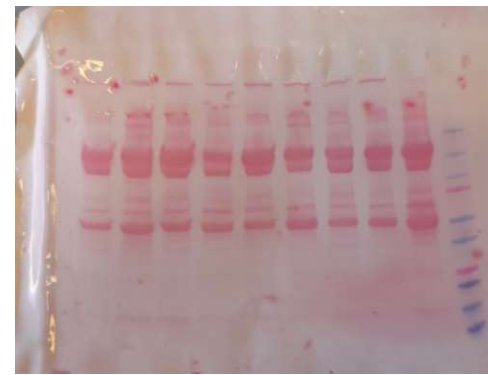

Gel 2

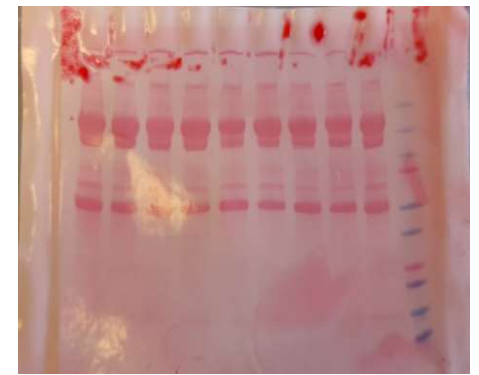

Gel 1

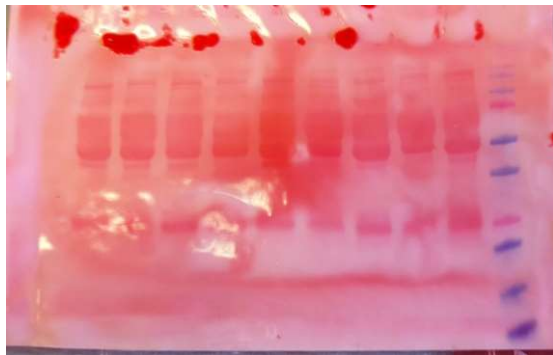

Gel 8

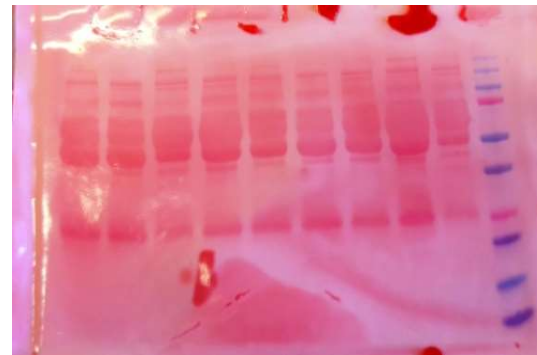

Gel 7

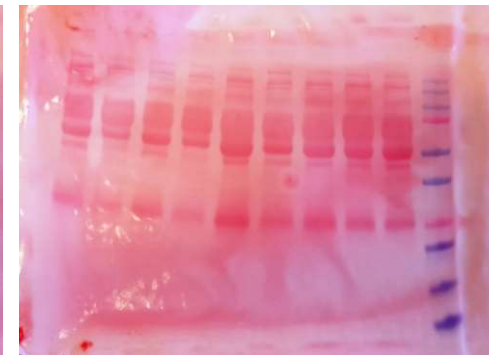

Gel 6

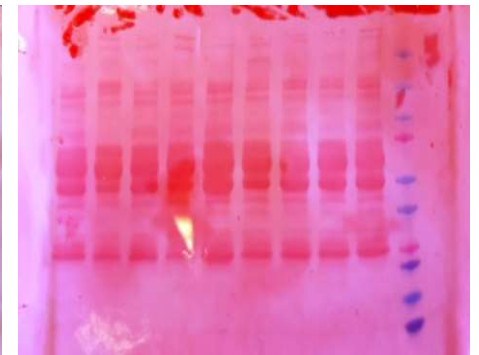

Gel 5

Whole membrane stained with red ponceau

## Whole membrane of CD9 and CD63 proteins

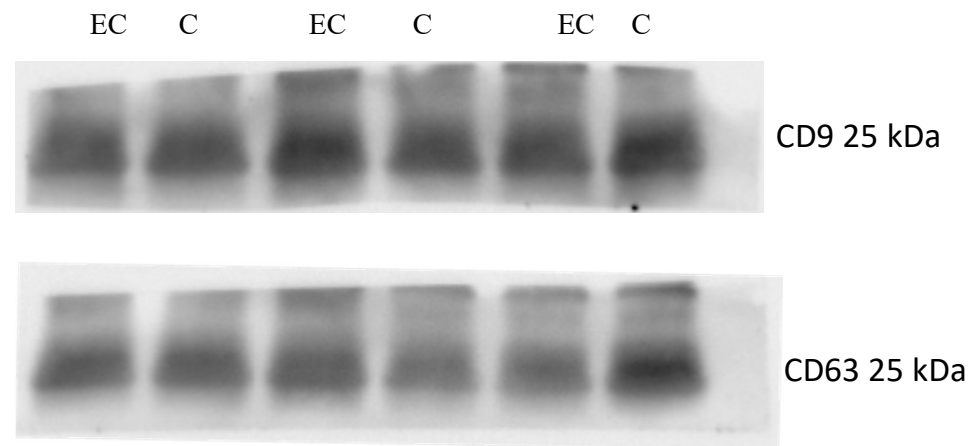

# Whole membrane of APOA1 protein

C-control  
EC- endometrial cancer

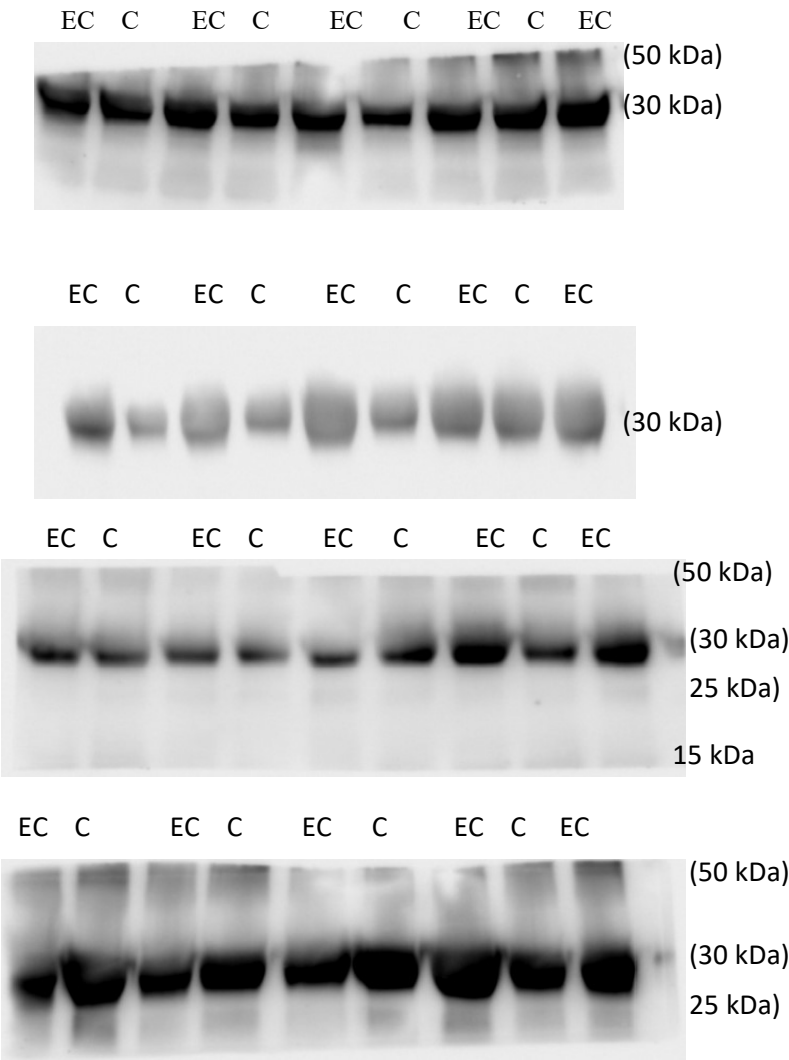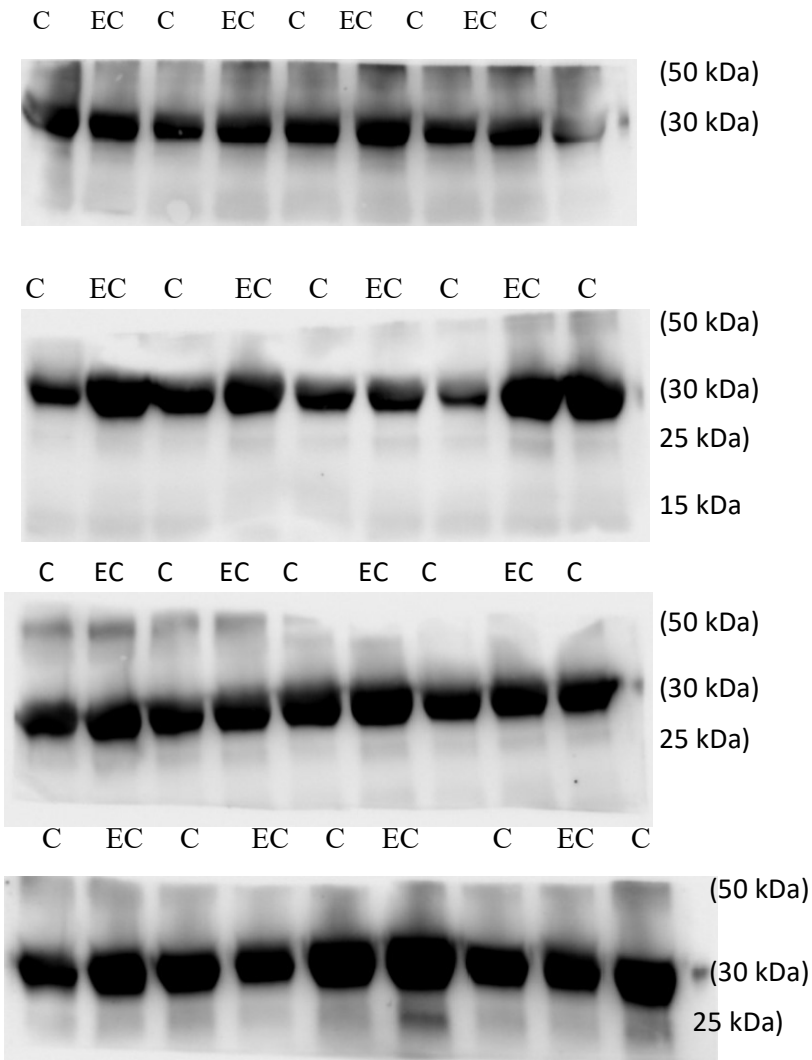

# Whole membrane of HBB protein

C-control  
EC- endometrial cancer

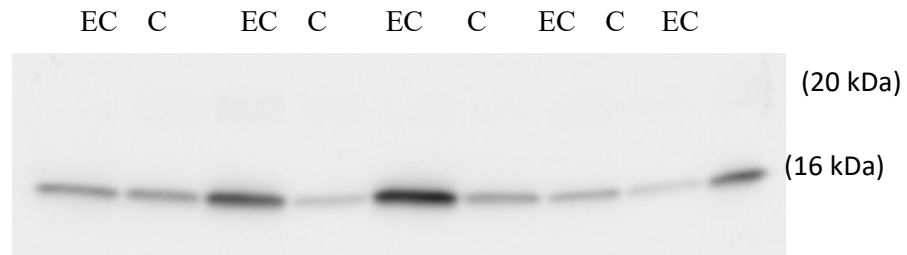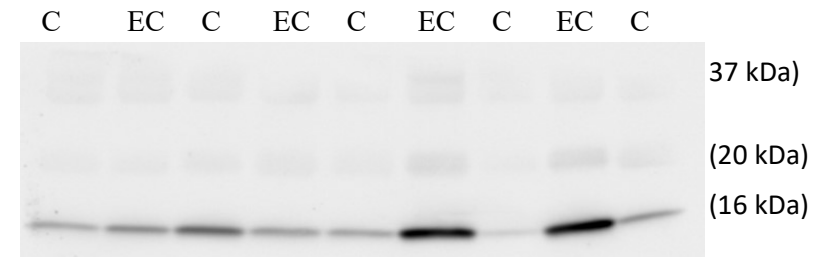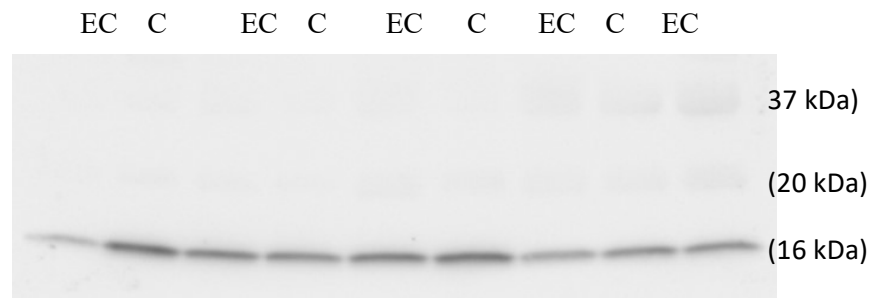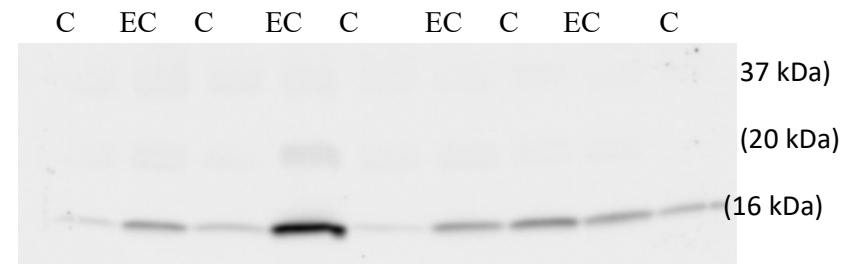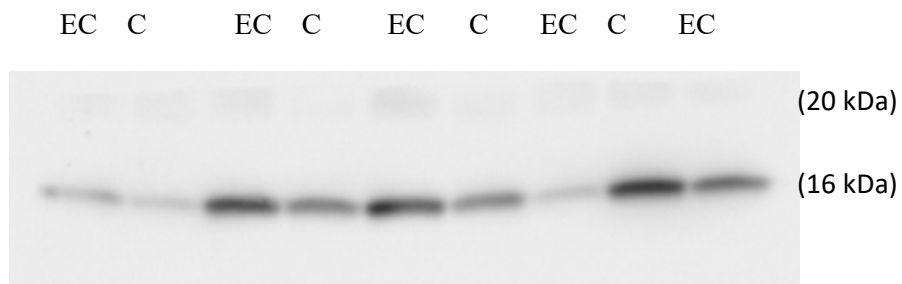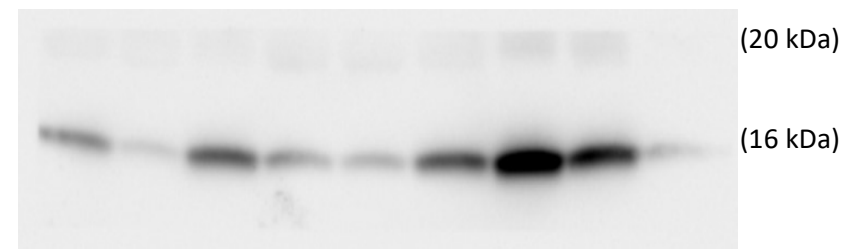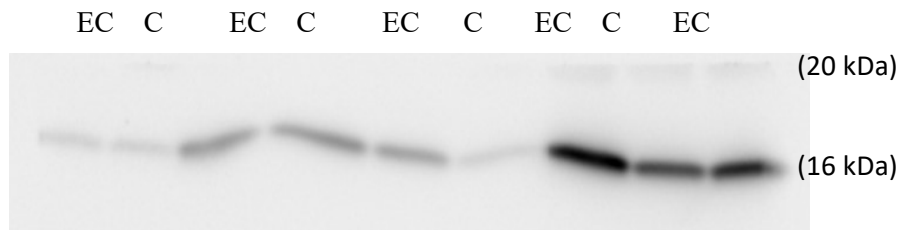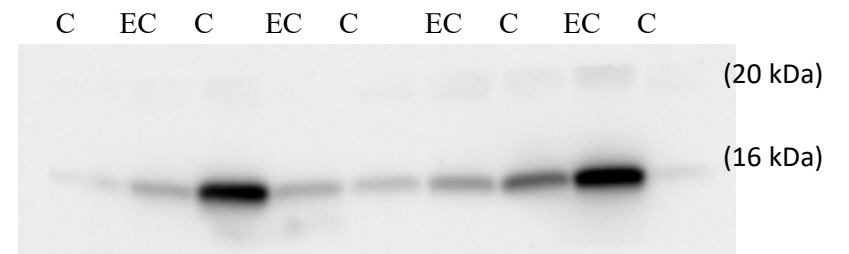

Whole membrane of CA1 protein

C-control  
EC- endometrial cancer

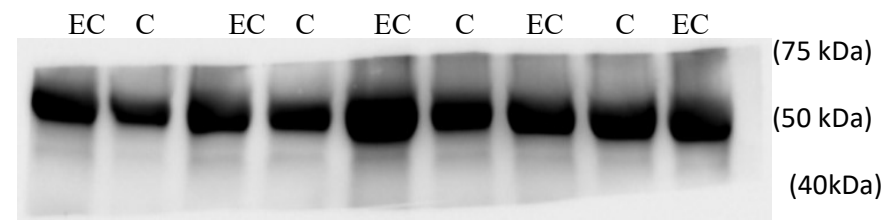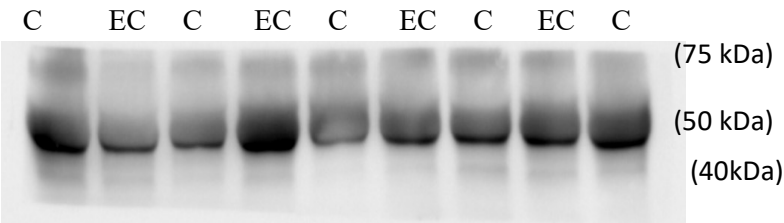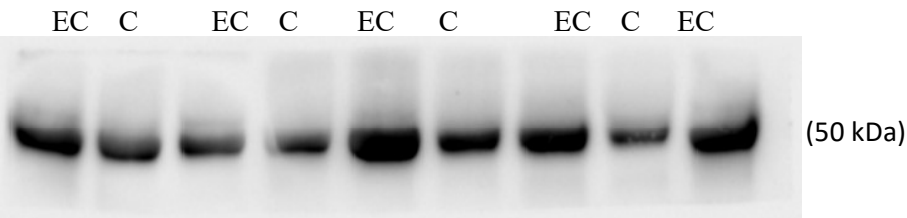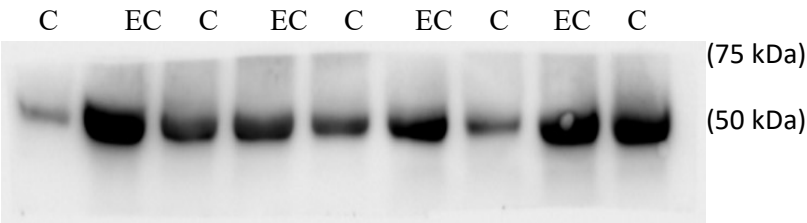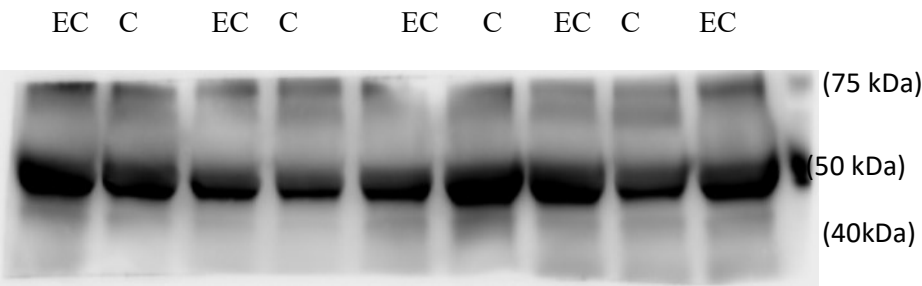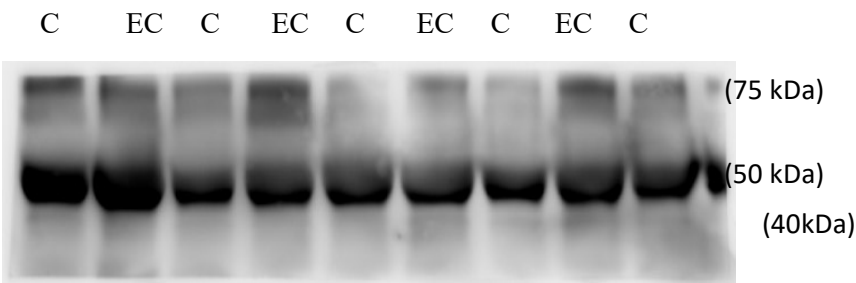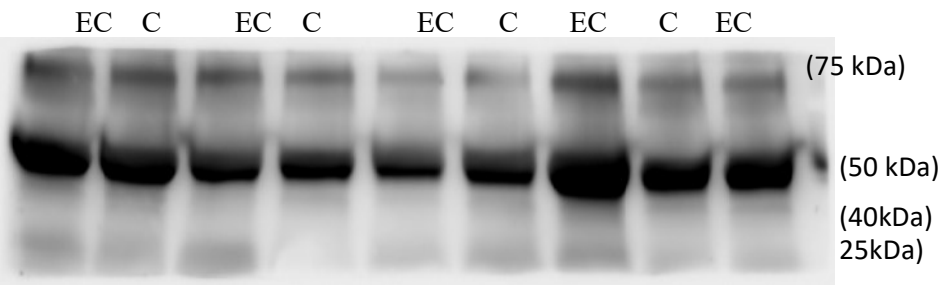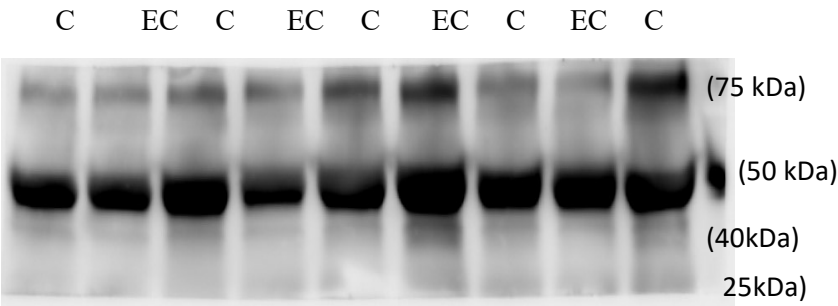

# Whole membrane of HBD protein

C-control  
EC- endometrial cancer

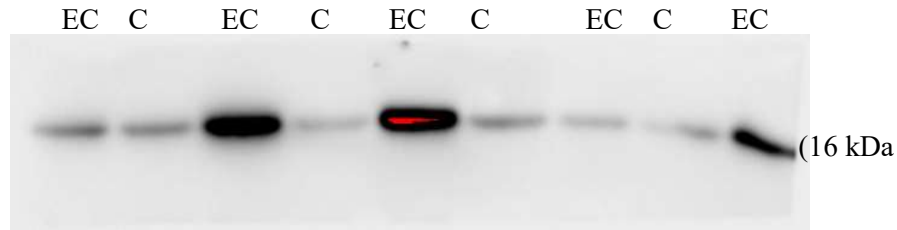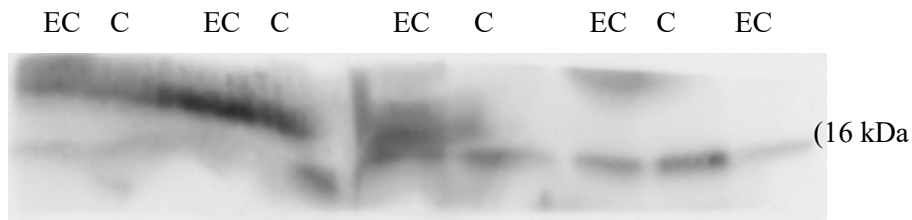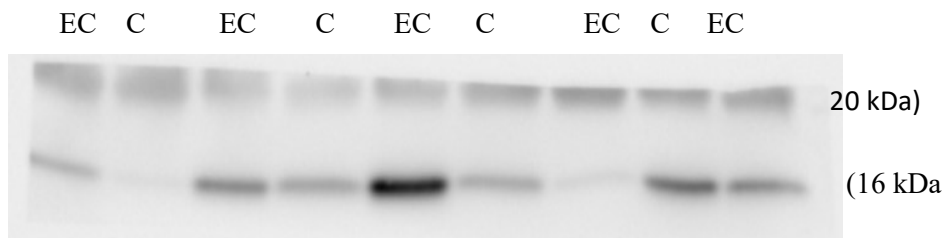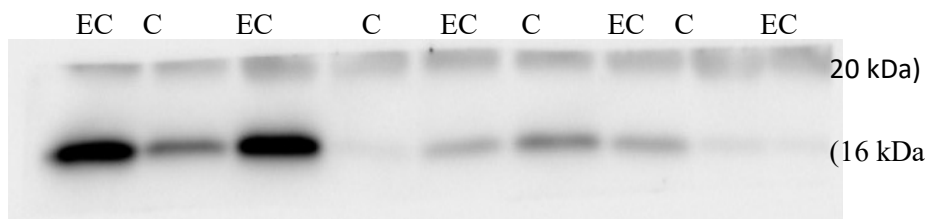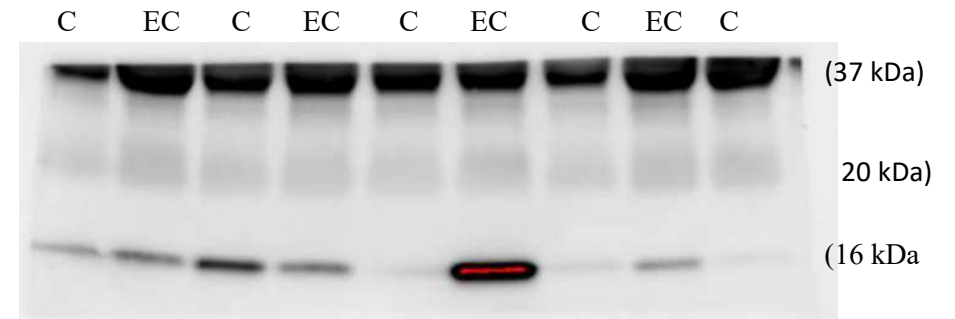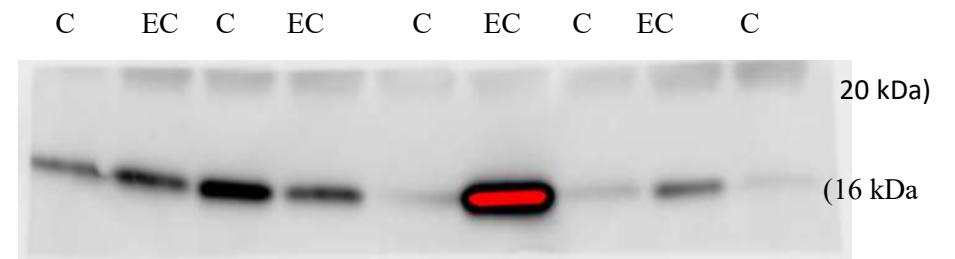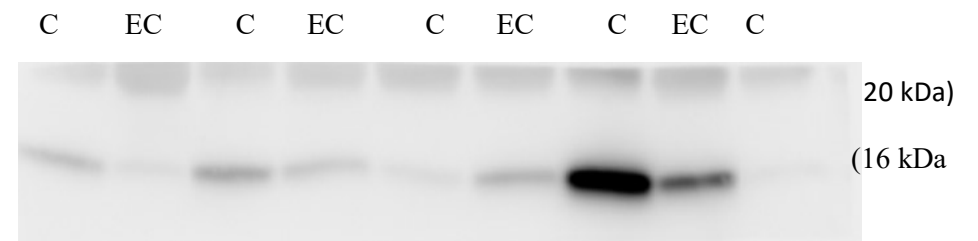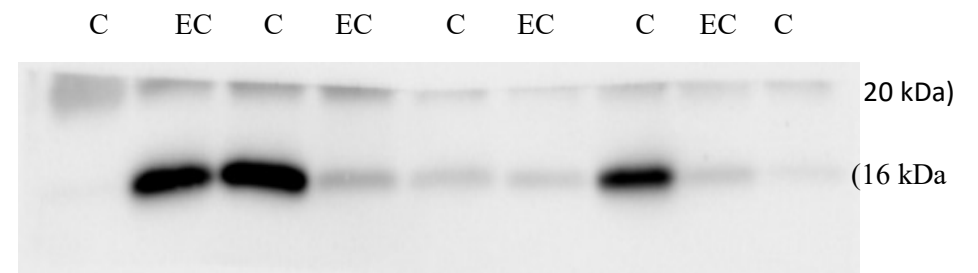

# Whole membrane of LPA protein

C-control  
EC- endometrial cancer

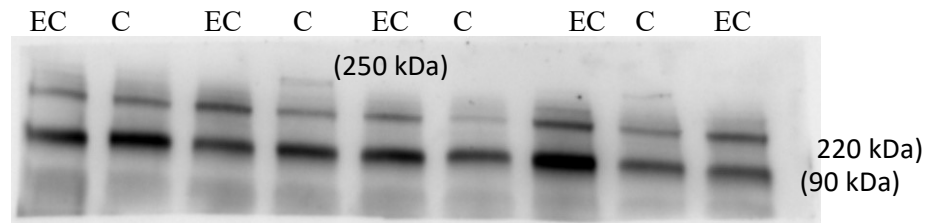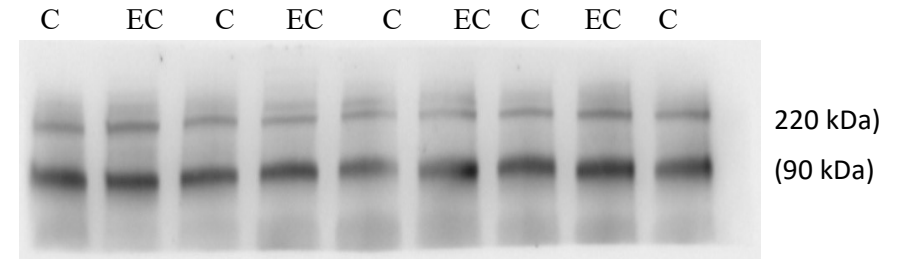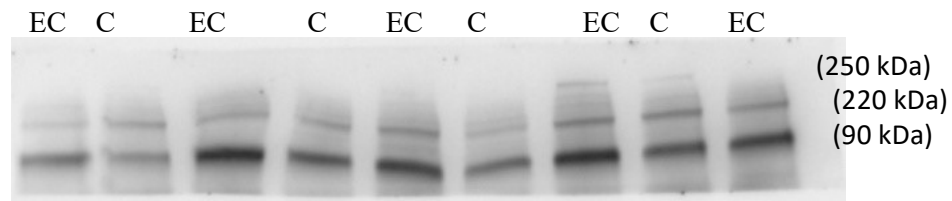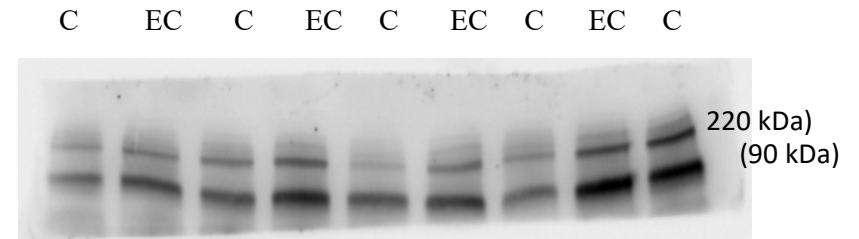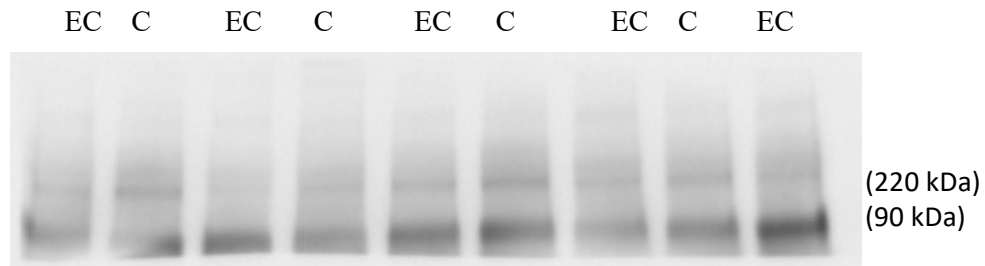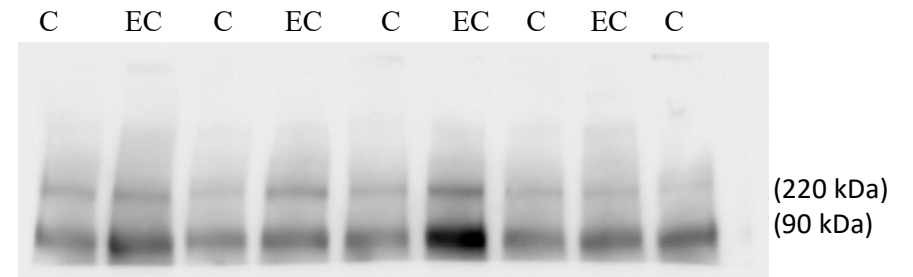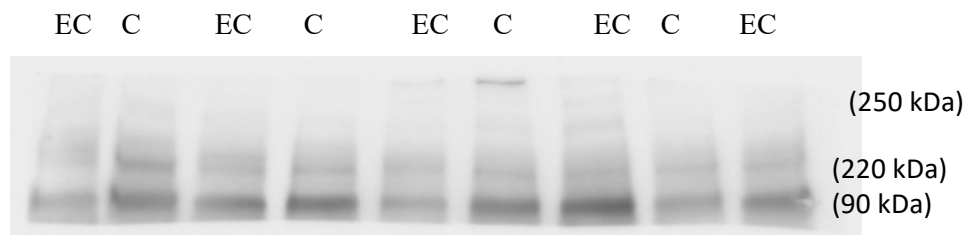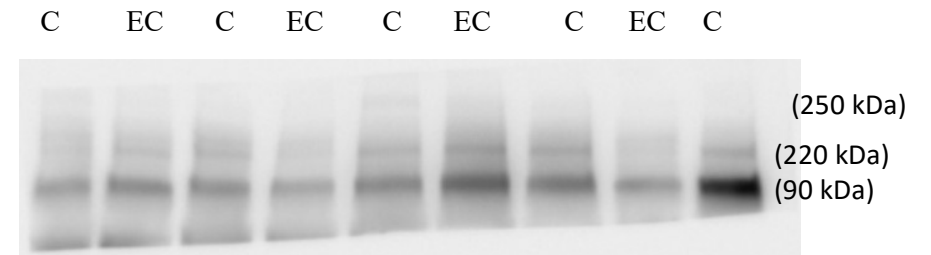

# Whole membrane of SAA4 protein

C-control  
EC- endometrial cancer

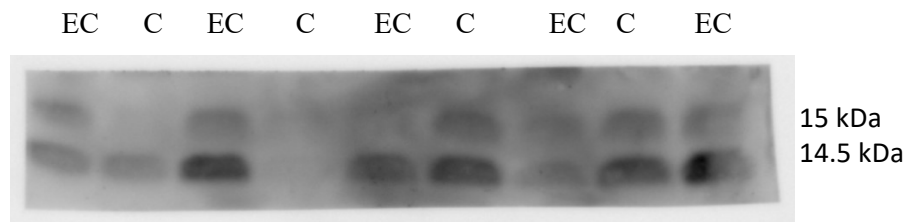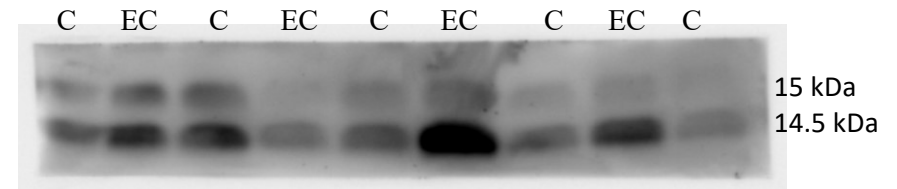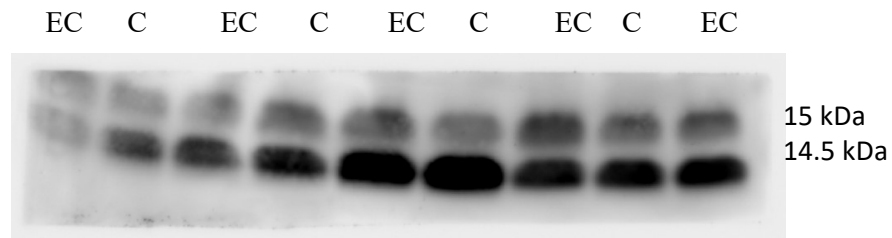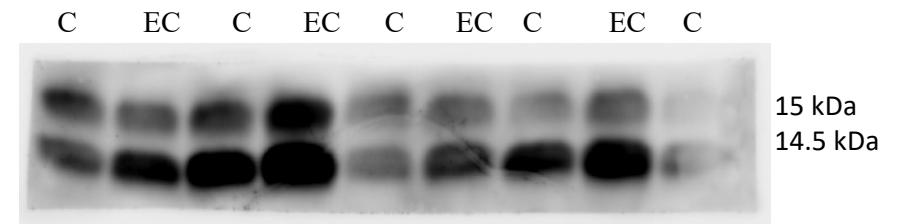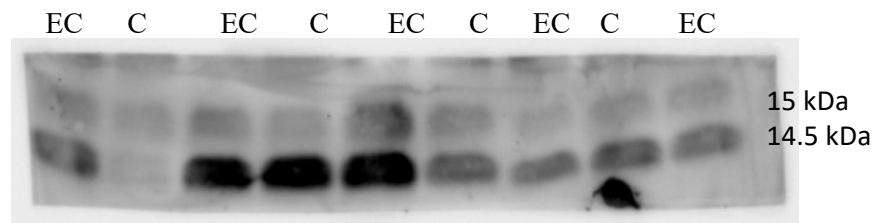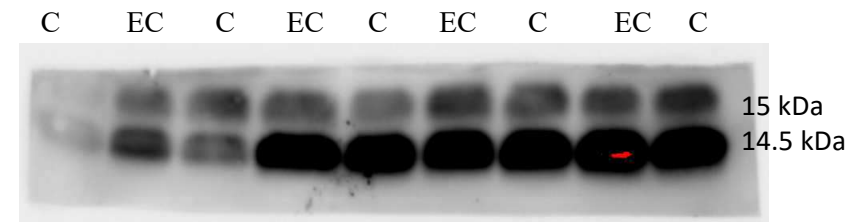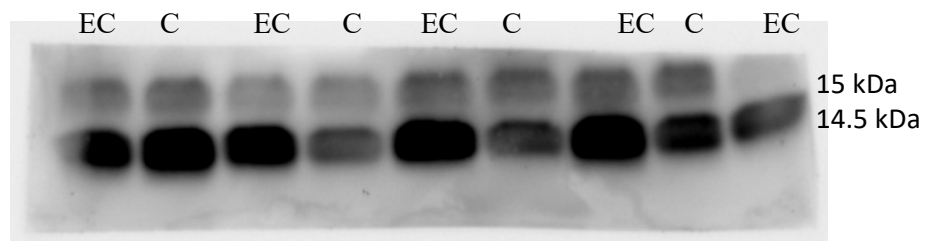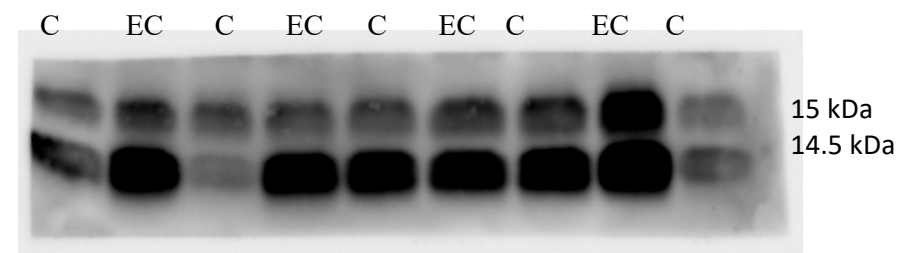



# Whole membrane of PF4V1 protein

C-control  
EC- endometrial cancer

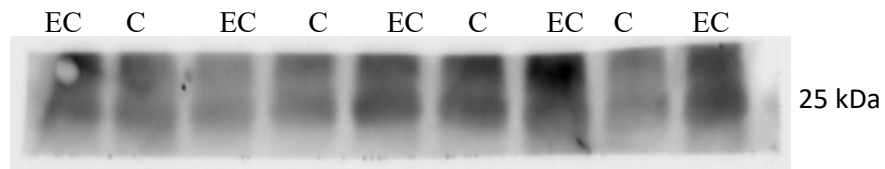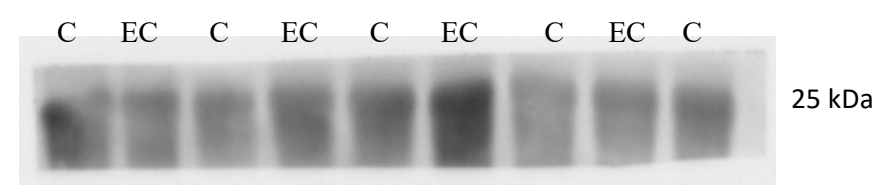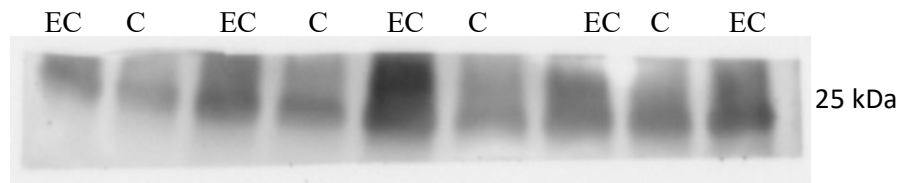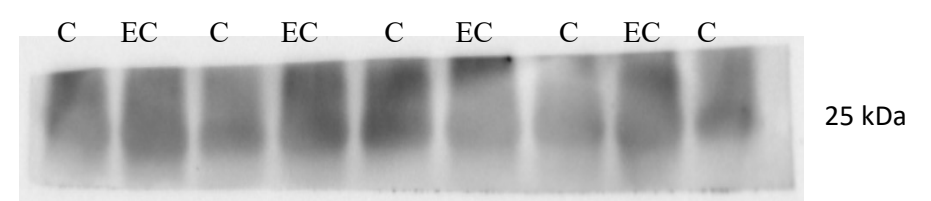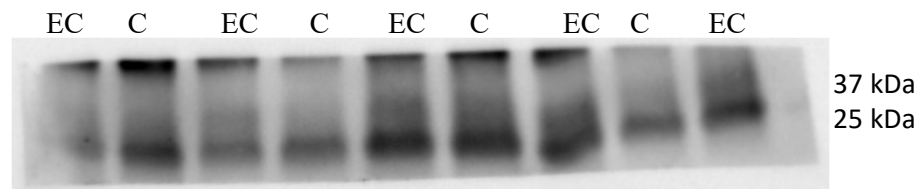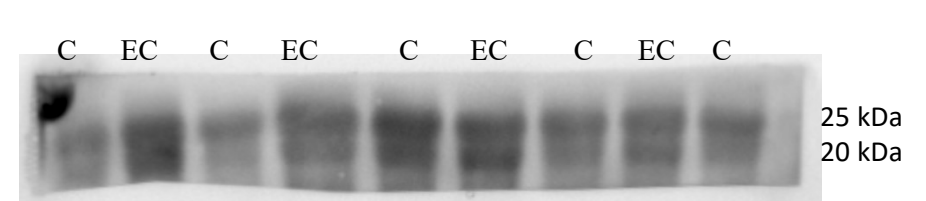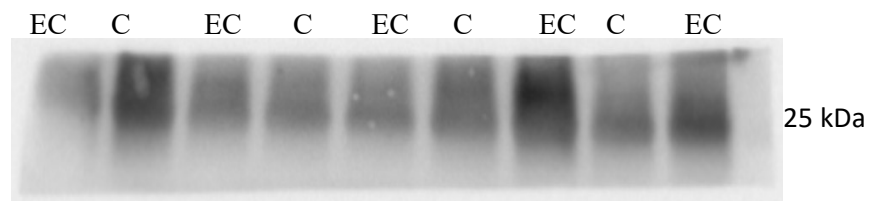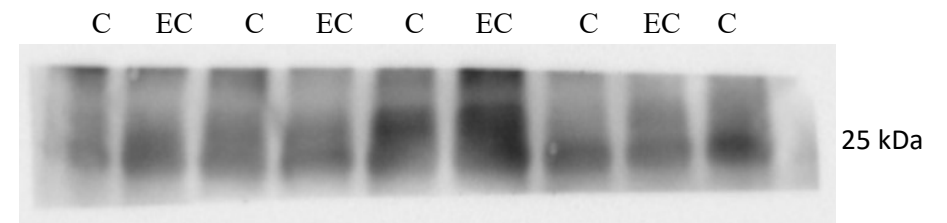

# Whole membrane of APOE protein

C-control  
EC- endometrial cancer

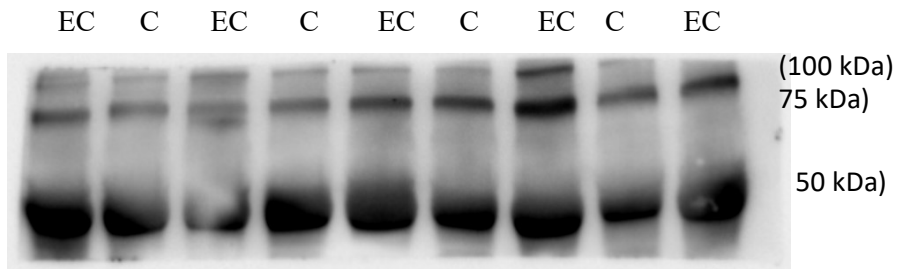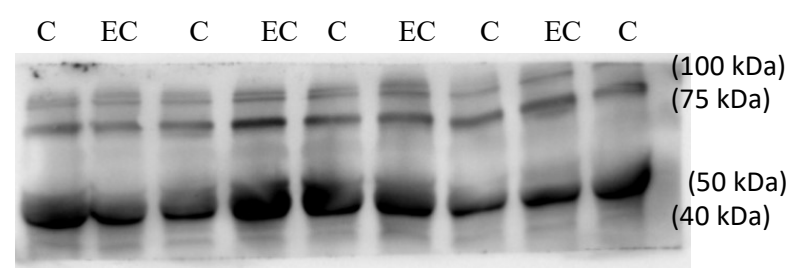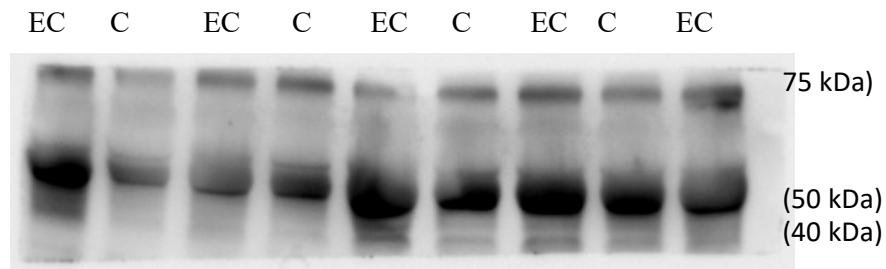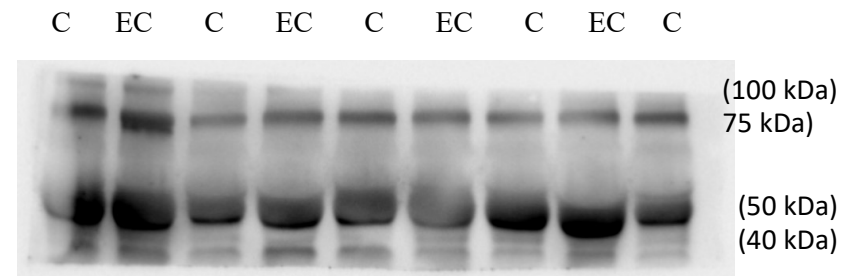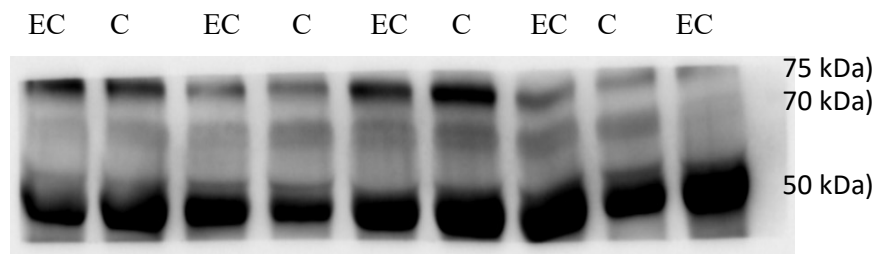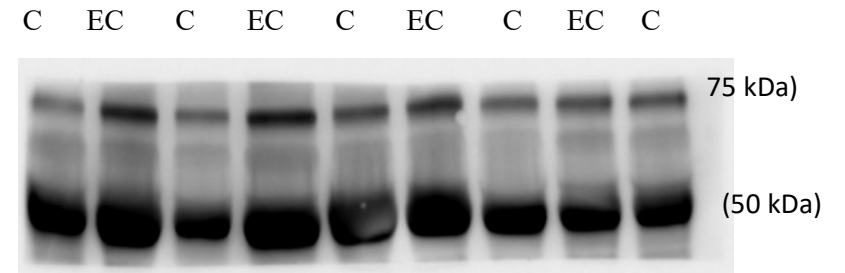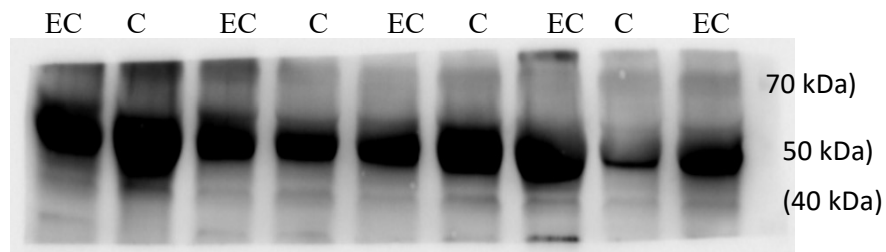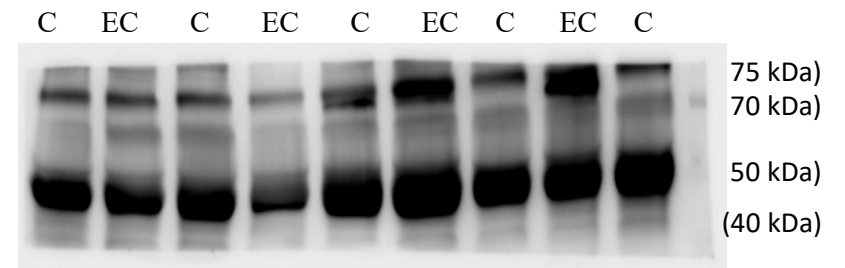

Supplement: s1 [file s1]
